# Supplementary material for: CdS-Decorated Porous Anodic SnOx Photoanodes with Enhanced Performance under Visible Light
Source: MDPI journal article supplement (doi:10.3390/ma15113848), 2022-05-27
Supplement: s1 [file s1]

## Supplementary Information

### CdS-decorated porous anodic SnO<sub>x</sub> photoanodes with enhanced performance under visible light

Karolina Gawlak<sup>1\*</sup>, Dominika Popiołek<sup>1</sup>, Marcin Pisarek<sup>2</sup>, Grzegorz D. Sulka<sup>1</sup>, Leszek Zaraska<sup>1\*</sup>

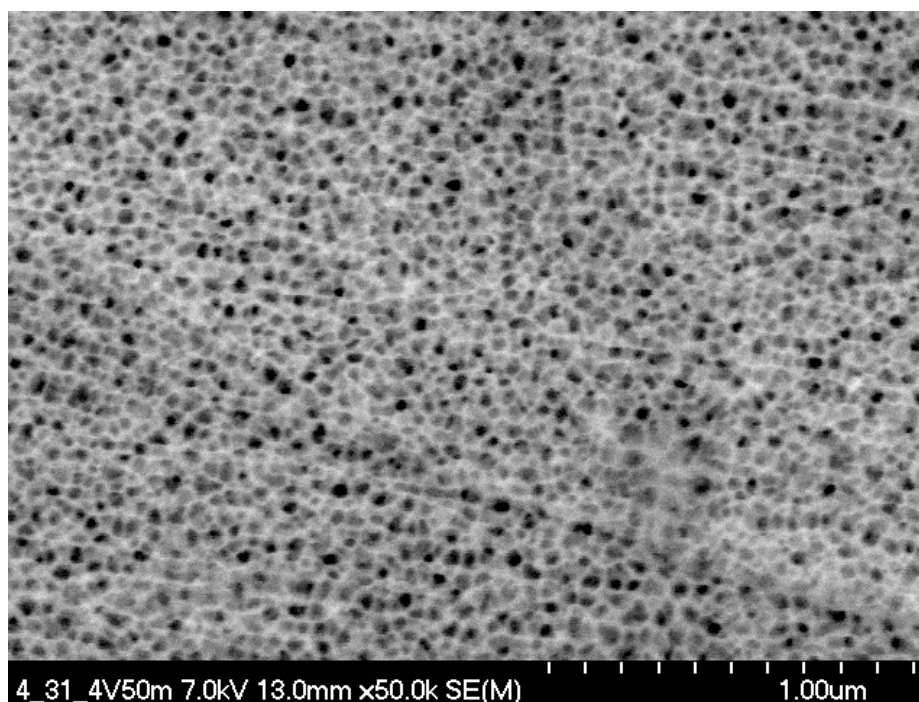

Figure S1. FE-SEM image of the as-anodized SnO<sub>x</sub> layer before deposition of CdS.

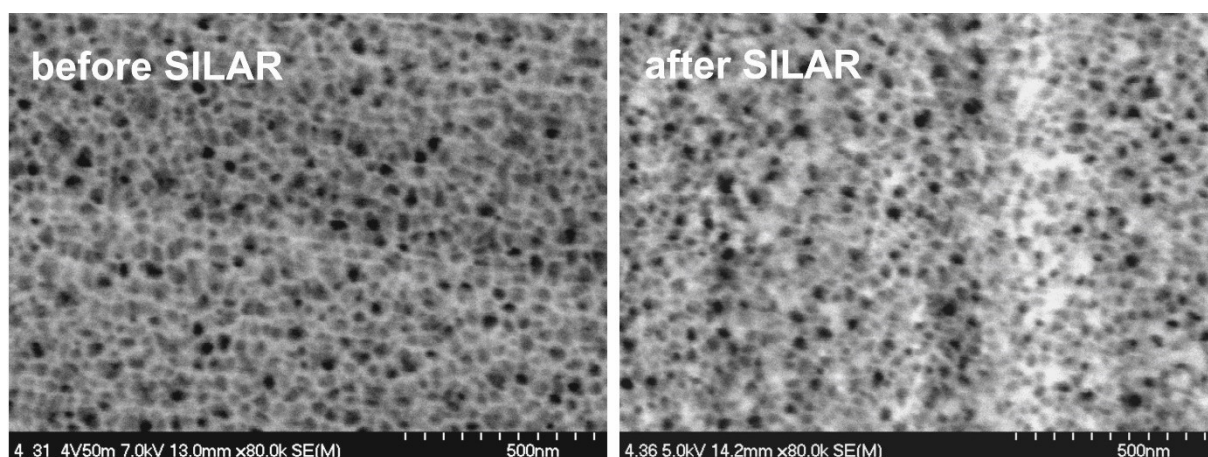

Figure S2. Higher magnification FE-SEM image of as-anodized  $\text{SnO}_x$  (left) and  $\text{SnO}_x$  modified with CdS after thermal treatment (right).

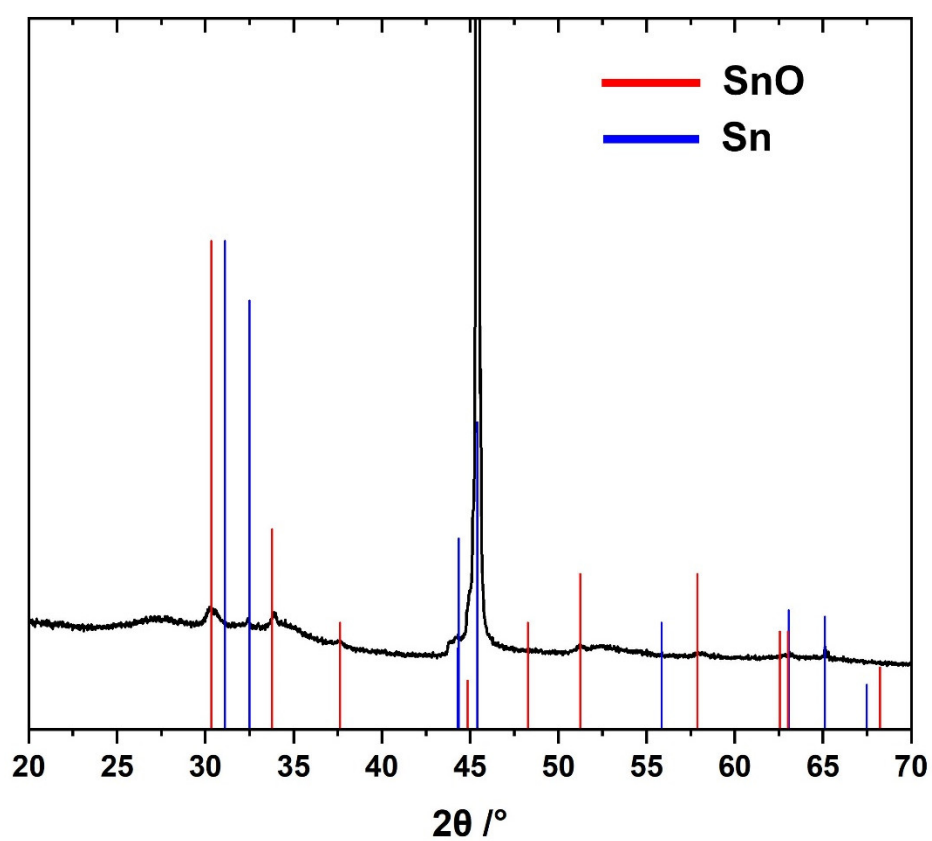

Figure S3. XRD pattern of the a/a sample.

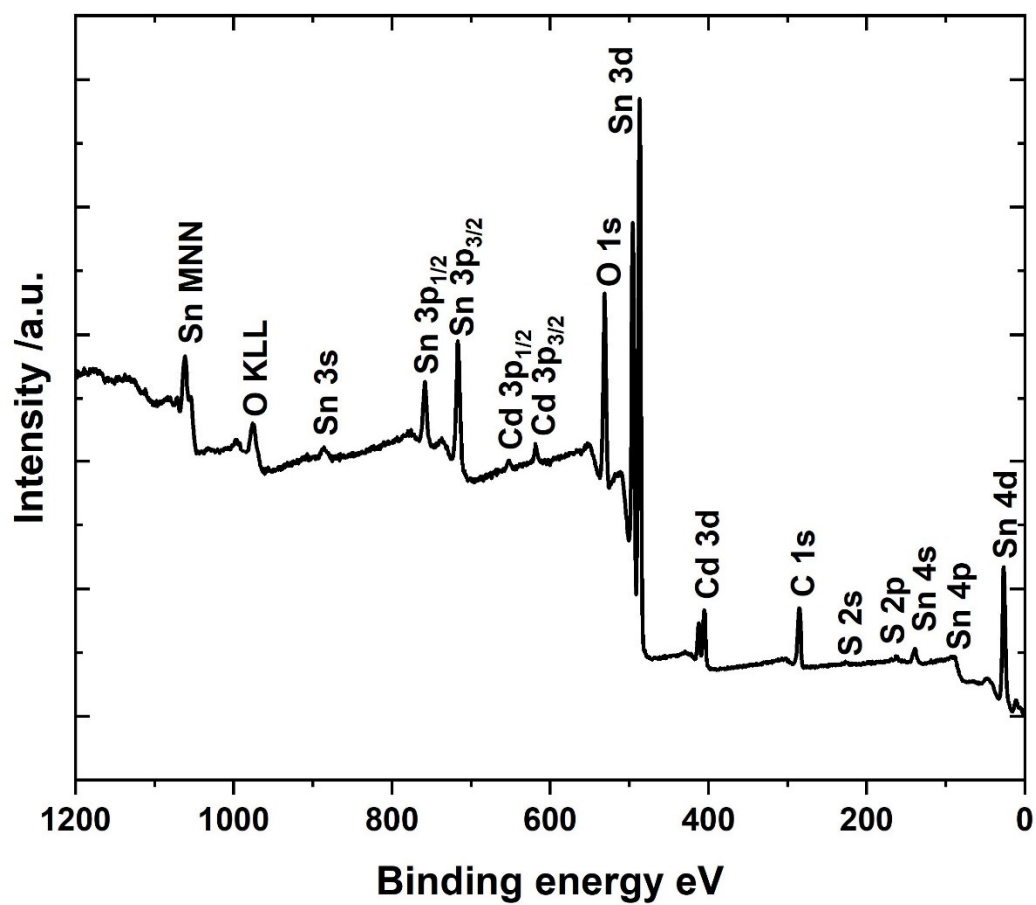

Figure S4. XPS survey spectrum of the a/a sample.
